# Supplementary material
Source: PubMed Central journal article supplement (PMC8179242)
Supplement: pnas.2101350118.sapp.pdf [file pnas.2101350118.sapp.pdf]

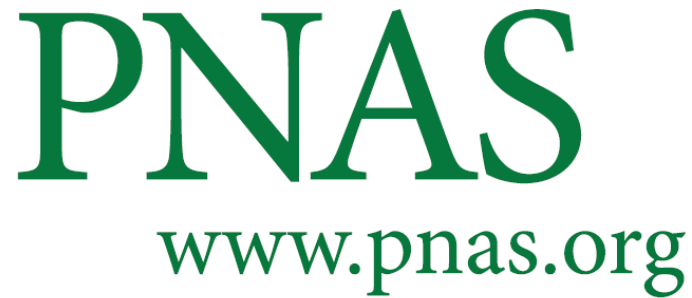

## Supplementary Information for

### **Accidental synthesis of a previously unknown quasicrystal in the first atomic bomb test**

Luca Bindi<sup>a</sup>, William Kolb<sup>b</sup>, G. Nelson Eby<sup>c</sup>, Paul D. Asimow<sup>d</sup>, Terry C. Wallace<sup>e</sup>, Paul J. Steinhardt<sup>f,\*</sup>

<sup>a</sup>Dipartimento di Scienze della Terra, Università di Firenze, Via La Pira 4, Florence, I-50121, Italy; <sup>b</sup>2702 Church Creek Ln, Edgewater, MD-21037, USA; <sup>c</sup>Department of Environmental Earth and Atmospheric Sciences, University of Massachusetts, Lowell, MA-01854, USA; <sup>d</sup>Division of Geological and Planetary Sciences, California Institute of Technology, Pasadena, CA-91125, USA; <sup>e</sup>Los Alamos National Laboratory, Los Alamos, NM-87545, USA; <sup>f</sup>Department of Physics, Princeton University, Jadwin Hall, Princeton, NJ-08544, USA. \*corresponding author

**Figure S1.** Back-scattered electron scanning electron image of the studied trinitite sample. The small bright grain enclosed in the red dashed circle contains the quasicrystal. Electron microprobe spot analyses are indicated.

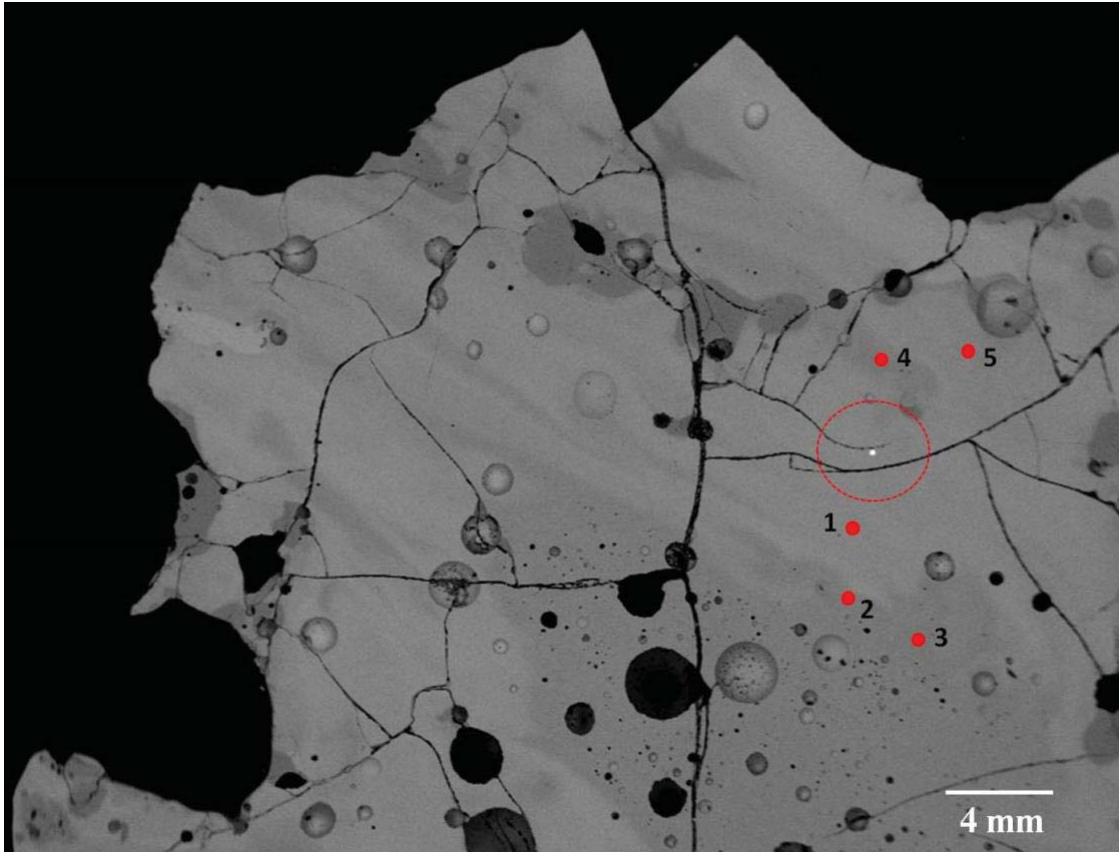

**Table S1.** Electron microprobe analyses of the spots indicated in Fig. S1.

|                                | <b>1</b> | <b>2</b> | <b>3</b> | <b>4</b> | <b>5</b> |
|--------------------------------|----------|----------|----------|----------|----------|
| SiO <sub>2</sub>               | 72.52    | 69.62    | 69.52    | 66.31    | 69.08    |
| Al <sub>2</sub> O <sub>3</sub> | 12.77    | 18.4     | 18.35    | 18.22    | 13.51    |
| CaO                            | 8.68     | n.d.     | n.d.     | n.d.     | 8.9      |
| Na <sub>2</sub> O              | 0.05     | n.d.     | n.d.     | n.d.     | 2.47     |
| K <sub>2</sub> O               | 5.92     | 11.9     | 11.89    | 15.41    | 5.88     |
| Total                          | 99.94    | 99.92    | 99.76    | 99.94    | 99.84    |

Note: n.d. = not determined, Major and minor elements were determined using a JEOL JXA-8600 electron microprobe at 15 kV accelerating voltage and 40 nA beam current (and a 1  $\mu$ m beam diameter), with 30 s as counting times. The standards used were diopside (Ca), sanidine (K) and albite (Na, Al, Si).
